# Supplementary material for: Medical costs and out-of-pocket expenditures associated with multimorbidity in China: quantile regression analysis
Source: HighWire-hosted journal article supplement (doi:10.1136/bmjgh-2020-004042), 2021-02-01
Supplement: bmjgh-2020-004042supp001_data_supplement.pdf [file bmjgh-2020-004042supp001_data_supplement.pdf]

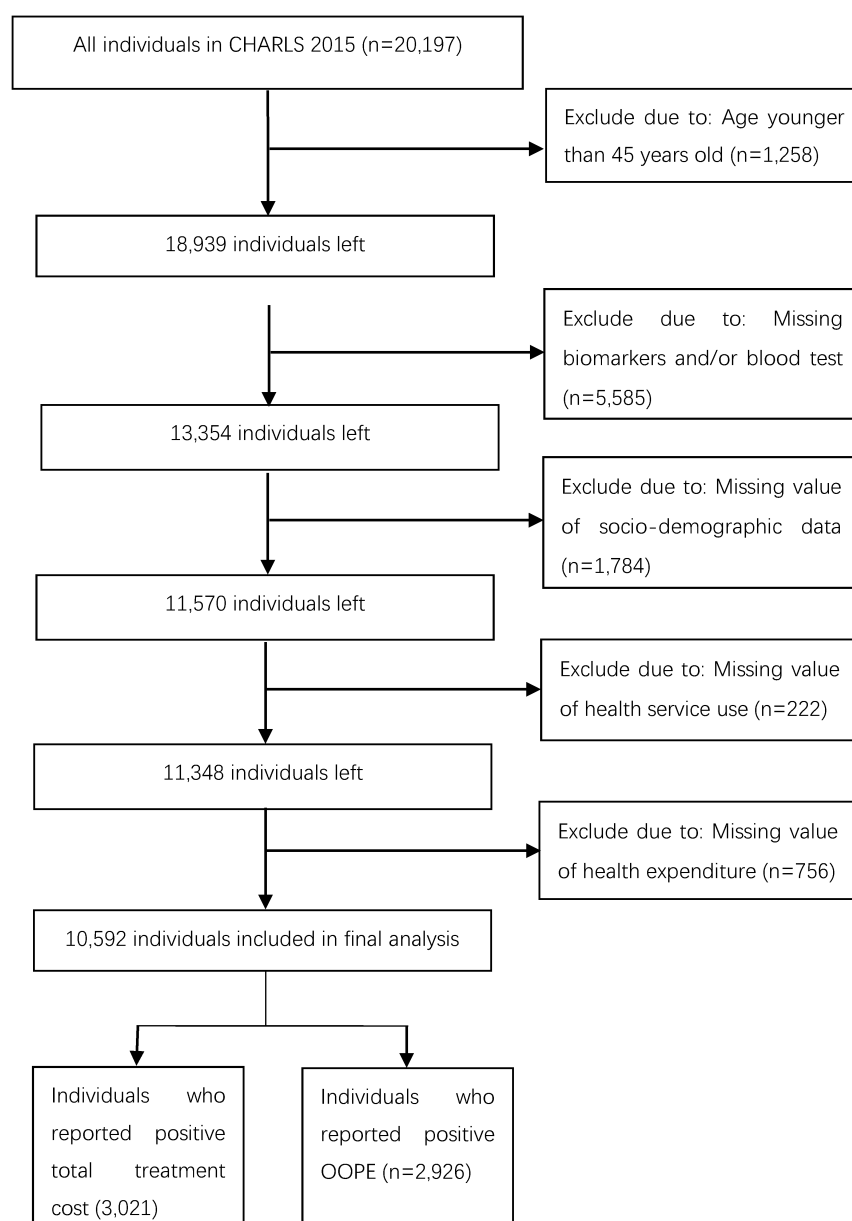

**Figure S1.** Flowchart showing the selection of the subjects who were included in the final analysis, 2015

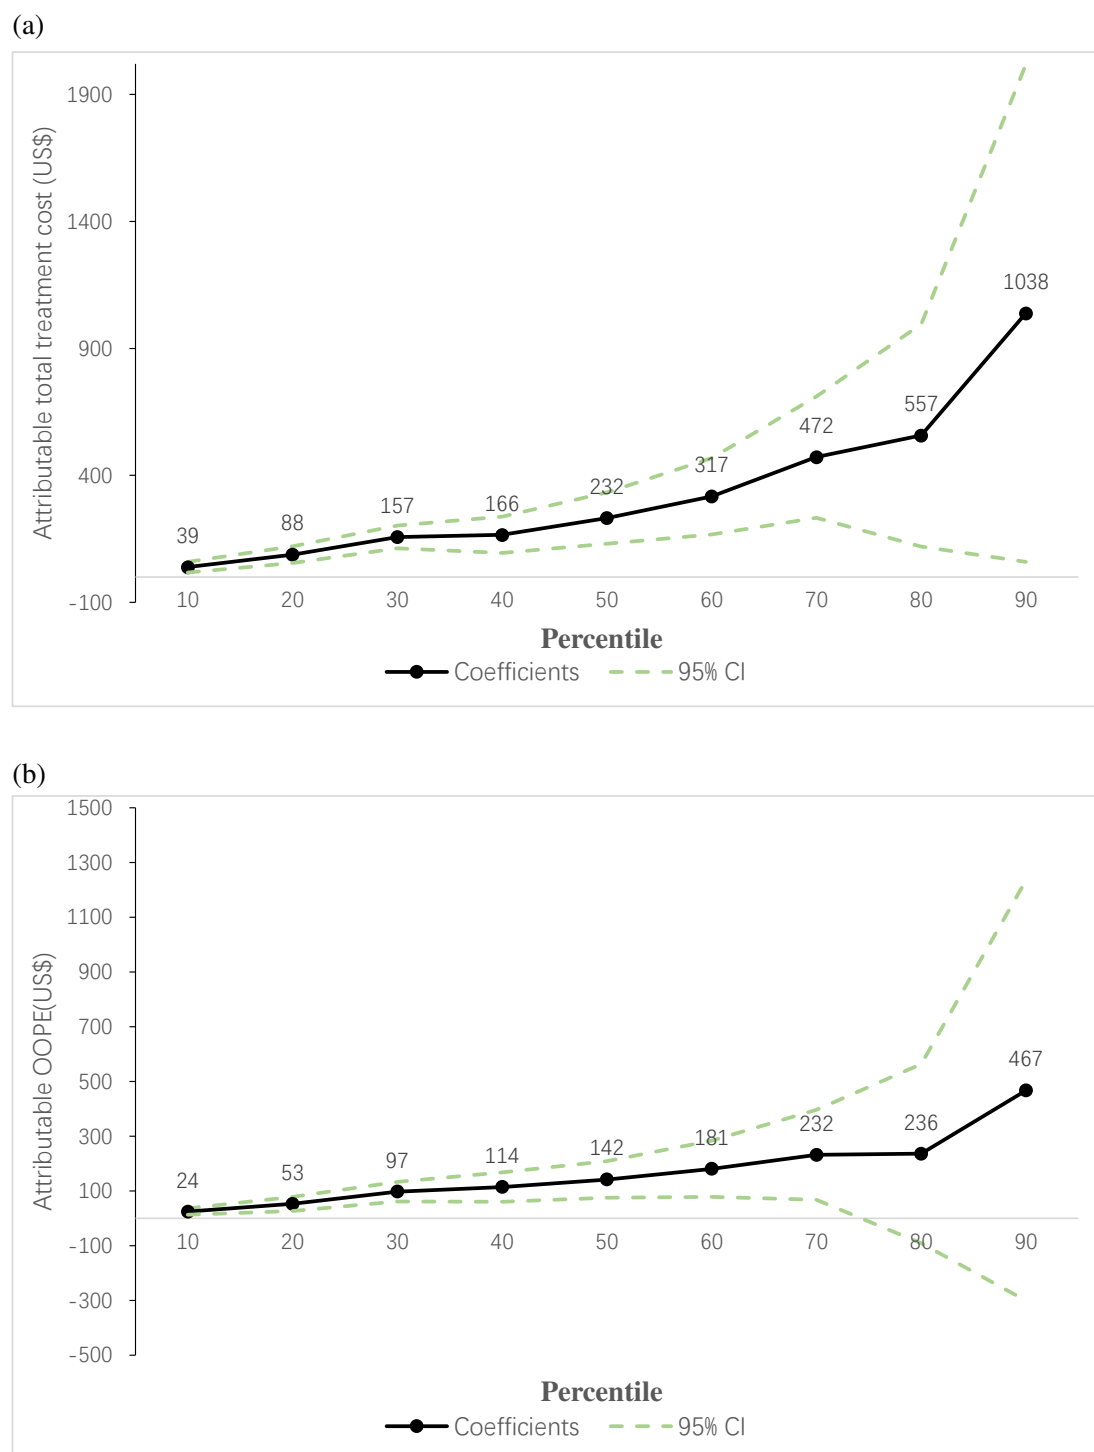

**Figure S2.** Distribution of total treatment cost (above) and annual OOOPE (below) associated with multimorbidity by quantiles of medical costs.
